# Supplementary material for: Virtual reality technology for upper and lower limb motor function, daily function, and balance in stroke patients: a meta-analysis of randomized controlled trials
Source: PeerJ. 2025 Dec 3;13:e20402. doi: 10.7717/peerj.20402 (PMC12681232; doi:10.7717/peerj.20402)
Supplement: Supplemental Information 5 [file peerj-13-20402-s005.xlsx]

## Sheet: Sheet1
Numbering/Lower Limb motor function	study	Exp n	Exp Mean	Exp SD	Cont n	Cont Mean	Cont SD	Training cycle	Training cycle group	Training time	Training time group	Type of patient	Type of intervention
1	da Silva Ribeiro 2015	15	17.2	17.2	15	2.8	5.69	8weeks	5-8weeks	60 min	10-40min	Chronic	Non-immersive
2	Ögün 2019	33	6.91	8.41	32	1.5	8.57	6 weeks	5-8weeks	60min	41-80min	Not specified	Immersive
3	Bower 2015	8	2.4	6.72	8	2.4	7.4	4weeks	1-4weeks	40 min	10-40min	Chronic	Immersive
4	Chen 2022	18	4.72	0.87	18	3.89	1.15	2weeks	1-4weeks	60min	41-80min	Subacute	Non-immersive
5	Ahmad 2019	18	8.5	9.15	18	6.72	7.65	8weeks	5-8weeks	30 min	10-40min	Chronic	Immersive
6	Choi 2024	23	8.7	4.11	23	4.69	5.12	8weeks	5-8weeks	40 min	10-40min	Not specified	Immersive
7	Miclaus 2021	31	3	6.55	28	1	6.62	2weeks	1-4weeks	70 min	41-80min	Subacute	Non-immersive
8	Llorens 2021	14	5.29	6.53	15	0.26	4.71	5weeks	5-8weeks	60min	41-80min	Chronic	Immersive
9	Adams 2023	9	10.1	7.49	9	1.6	11.32	8weeks	5-8weeks	45min	41-80min	Not specified	Immersive
10	Huang 2022	15	3.07	9.06	15	1.06	16.49	7weeks	5-8weeks	60min	41-80min	Chronic	Immersive
11	Park 2019	12	1.9	7.5	13	2.1	10.1	4weeks	1-4weeks	60min	41-80min	Chronic	Non-immersive
12	Norouzi-Gheidari 2019	9	2.1	17.88	9	-0.2	11.87	4weeks	1-4weeks	44min	41-80min	Subacute	Immersive
13	Jo 2024	15	2.59	11.09	15	0.74	12.03	4weeks	1-4weeks	30min	10-40min	Chronic	Immersive
14	Sip 2023	10	7.5	20.43	10	6	12.31	3weeks	1-4weeks	30min	10-40min	Not specified	Immersive
15	Aşkın 2018	18	3	8.62	20	1	9.75	4weeks	1-4weeks	60min	41-80min	Chronic	Non-immersive
16	Chen 2021	12	3.59	15.84	11	6.09	17.44	3weeks	1-4weeks	60min	41-80min	Not specified	Non-immersive
17	Lee 2016	5	4.4	2.96	5	1.8	8.95	4weeks	1-4weeks	60min	41-80min	Subacute	Immersive
18	Lee 2012	20	0.6	0.75	20	0.1	1	4weeks	1-4weeks	20min	10-40min	Chronic	Non-immersive
19	Kim 2018	12	15.6	11.25	11	14.6	15.88	2weeks	1-4weeks	30min	10-40min	Subacute	Non-immersive
20	Wan 2025	14	4.36	2.68	16	3.63	2.85	4weeks	1-4weeks	20min	10-40min	Not specified	Non-immersive
Numbering/daily function	study	Exp n	Exp Mean	Exp SD	Cont n	Cont Mean	Cont SD	Training cycle	Training cycle group	Training time	Training time group	Type of patient	Type of intervention
1	da Silva Ribeiro 2015	15	40	18.41	15	24.7	23.26	8weeks	5-8weeks	60 min	10-40min	Chronic	Non-immersive
2	Ögün 2019	33	4.79	7.34	32	0.71	6.39	6 weeks	5-8weeks	60min	41-80min	Not specified	Immersive
3	Bower 2015	8	1	1.81	8	0.6	1.81	4weeks	1-4weeks	40 min	10-40min	Chronic	Immersive
4	Ahmad 2019	18	2.36	11.28	18	1.82	11.11	8weeks	5-8weeks	30 mins	10-40min	Chronic	Immersive
5	Choi 2024	23	7.85	6.51	23	7.15	6.46	8weeks	5-8weeks	40 min	10-40min	Not specified	Immersive
6	Miclaus 2021	31	0	13	28	0	15.75	2weeks	1-4weeks	70 min	41-80min	Subacute	Non-immersive
7	Adams 2023	9	1.34	0.83	9	0.03	0.83	8weeks	5-8weeks	45min	41-80min	Not specified	Immersive
8	Park 2019	12	5.1	16.6	13	5.8	16.82	4weeks	1-4weeks	60min	41-80min	Chronic	Non-immersive
9	Norouzi-Gheidari 2019	9	0.7	0.7	9	-0.5	0.75	4weeks	1-4weeks	44min	41-80min	Subacute	Immersive
10	Sip 2023	10	-19.1	20.95	10	-5.3	18.43	3weeks	1-4weeks	30min	10-40min	Not specified	Immersive
11	Chen 2021	12	7.66	42.99	11	-3.73	37.55	3weeks	1-4weeks	60min	41-80min	Not specified	Non-immersive
12	Yatar 2015	15	1.74	6.66	15	2.86	6.98	4weeks	1-4weeks	60min	41-80min	Chronic	Non-immersive
13	Huh 2015	23	8	11.11	17	7.38	8.98	2weeks	1-4weeks	30min	10-40min	Subacute	Non-immersive
14	Lee 2012	20	6.4	17.52	20	2.5	13.07	4weeks	1-4weeks	20min	10-40min	Chronic	Non-immersive
15	Kim 2018	12	22.8	15.7	11	27.3	19.24	2weeks	1-4weeks	30min	10-40min	Subacute	Non-immersive
16	Butcher 2025	16	1	1.18	8	1.1	2.48	7weeks	5-8weeks	30 mins	10-40min	Subacute	Non-immersive
17	Ase 2025	7	1.16	0.68	7	-0.02	0.19	4weeks	1-4weeks	30min	10-40min	Chronic	Non-immersive
Numbering/balance	study	Exp n	Exp Mean	Exp SD	Cont n	Cont Mean	Cont SD	Training cycle	Training cycle group	Training time	Training time group	Type of patient	Type of intervention
1	da Silva Ribeiro 2015	15	3	2.16	15	2.3	2.02	8weeks	5-8weeks	60 min	10-40min	Chronic	Non-immersive
2	Bower 2015	8	64.3	33.05	8	75.1	32.36	4weeks	1-4weeks	40 min	10-40min	Chronic	Immersive
3	Miclaus 2021	31	0	1	28	0	1	2weeks	1-4weeks	70 min	41-80min	Subacute	Non-immersive
4	Lee 2016	5	4.4	4.25	5	2.4	3.37	4weeks	1-4weeks	60min	41-80min	Subacute	Immersive
5	Yatar 2015	15	4.73	4.8	15	4.6	8.64	2weeks	1-4weeks	30min	10-40min	Subacute	Non-immersive
6	Huh 2015	23	7.05	6.23	17	3.69	4.77	4weeks	1-4weeks	20min	10-40min	Chronic	Non-immersive
7	Lee 2012	20	5.9	8.28	20	1.7	6.85	2weeks	1-4weeks	30min	10-40min	Subacute	Non-immersive
8	Song 2015	20	0.73	7.8	20	2.9	6.56	8weeks	5-8weeks	30min	10-40min	Not specified	Non-immersive
9	In 2016	13	3.62	3.62	12	0	3.02	4weeks	1-4weeks	30min	10-40min	Chronic	Non-immersive
10	Wan 2025	14	5.5	3.11	16	3.38	2.34	4weeks	1-4weeks	20min	10-40min	Not specified	Non-immersive
11	Han 2025	15	4.33	3.89	15	2.44	2.19	6weeks	5-8weeks	30min	10-40min	Chronic	Non-immersive
Numbering/Upper Limb Motor Function	study	Exp n	Exp Mean	Exp SD	Cont n	Cont Mean	Cont SD	Training cycle	Training cycle group	Training time	Training time group	Type of patient	Type of intervention
1	Ahmad 2019	18	0	27.72	18	0.56	22.34	8weeks	5-8weeks	30 mins	10-40min	Chronic	Immersive
2	Choi 2024	23	11.57	4.93	23	6.97	5.4	8weeks	5-8weeks	40 min	10-40min	Not specified	Immersive
3	Miclaus 2021	31	0.16	0.932	28	0.21	0.77	2weeks	1-4weeks	70 min	41-80min	Subacute	Non-immersive
4	Huang 2022	15	42.27	8.06	15	37	14.76	7weeks	5-8weeks	60min	41-80min	Chronic	Immersive
5	Park 2019	12	2.1	5.12	13	0.9	10.78	4weeks	1-4weeks	60min	41-80min	Chronic	Non-immersive
6	Norouzi-Gheidari 2019	9	10.5	36.35	9	1.1	27.02	4weeks	1-4weeks	44min	41-80min	Subacute	Immersive
7	Jo 2024	15	1.93	4.25	15	0.26	4.92	4weeks	1-4weeks	30min	10-40min	Chronic	Immersive
8	Aşkın 2018	18	0	0.86	20	0	0.86	4weeks	1-4weeks	60min	41-80min	Chronic	Non-immersive
9	Butcher 2025	16	8.3	9.44	8	8.6	15.59	7weeks	5-8weeks	30 mins	10-40min	Subacute	Non-immersive
10	Ase 2025	7	10.1	7.7	7	2.7	4	4weeks	1-4weeks	30min	10-40min	Chronic	Non-immersive
